# Supplementary material
Source: publisher figshare collection journal article supplement (https://acs.figshare.com/ndownloader/files/11059583)
Supplement: Supplementary file 1 [file 11059583]

**Supporting Information for**

Three-Dimensional Boron- and Nitrogen-Codoped Graphene Aerogel Supported Pt  
Nanoparticles as Highly Active Electrocatalysts for Methanol Oxidation Reaction

*Miaomiao Li,<sup>#</sup> Quanguo Jiang,<sup>#</sup> Minmin Yan, Yujie Wei, Jianbo Zong, Jianfeng Zhang, Yuping Wu, and  
Huajie Huang\**

College of Mechanics and Materials, Hohai University, Nanjing 210098, China

\*E-mail address: huanghuajie@hhu.edu.cn

Total number of pages: 6

Total number of Figures: 9

## Supplementary Results

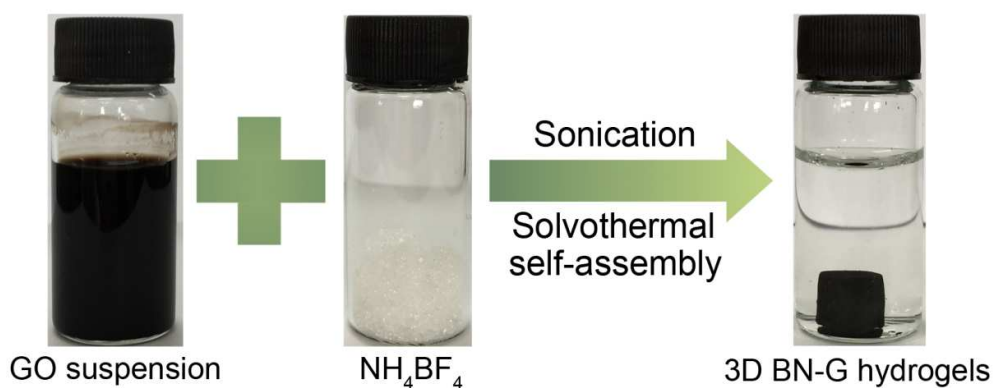

**Figure S1.** The synthetic process for 3D BN-G aerogels, which includes: (1) mixture of GO suspension and  $\text{NH}_4\text{BF}_4$  by magnetic stirring and sonication; (2) generation of 3D BN-G hydrogels by a solvothermal process; (3) formation of 3D BN-G aerogels by freeze-drying.

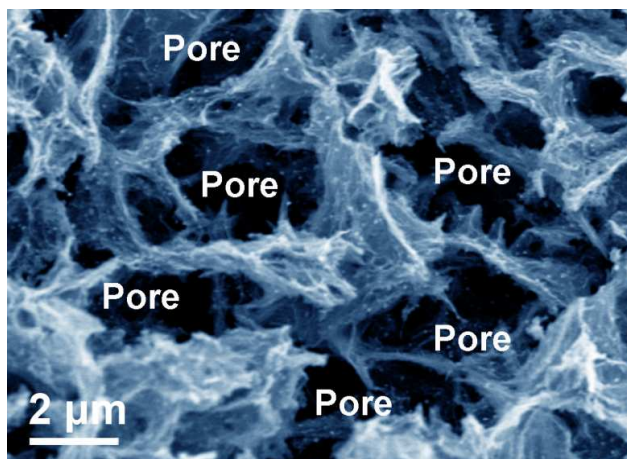

**Figure S2.** FE-SEM images of the 3D Pt/BN-GA catalyst, indicating that the material has numerous well-defined macropores.

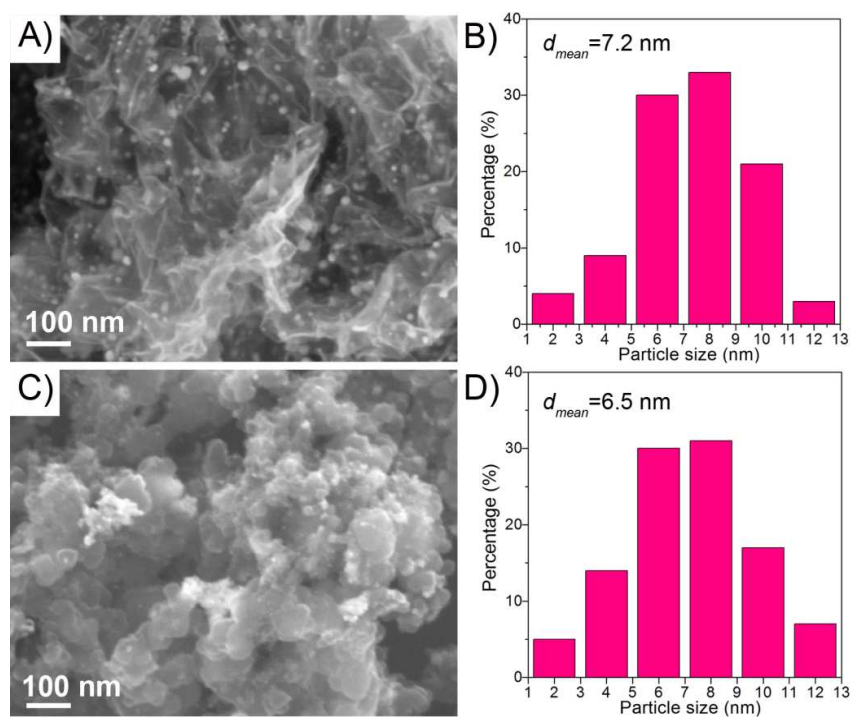

**Figure S3.** Typical FE-SEM images and Pt particle size distribution of (A and B) Pt/G and (C and D) Pt/C, respectively, showing that the Pt particles easily form large clusters in these conventional samples.

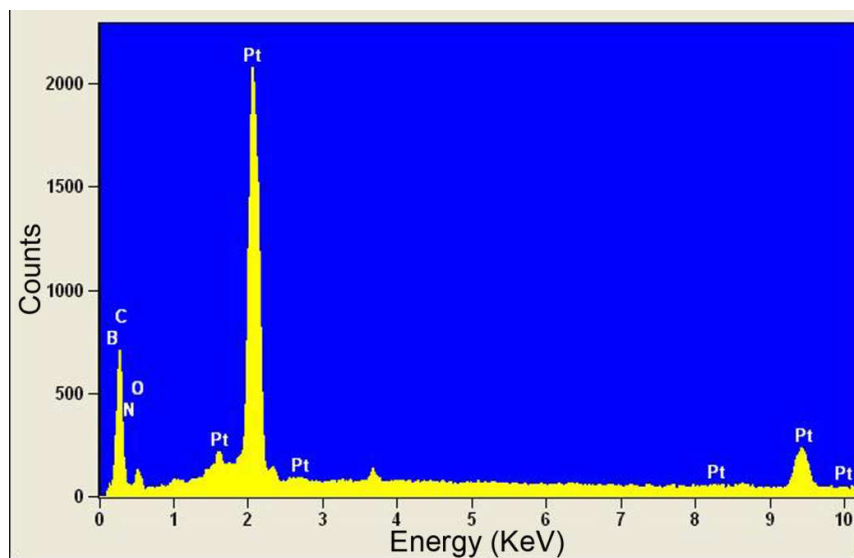

**Figure S4.** EDX spectrum of the 3D Pt/BN-GA catalyst confirms the existence of C, O, B, N, and Pt components in the material.

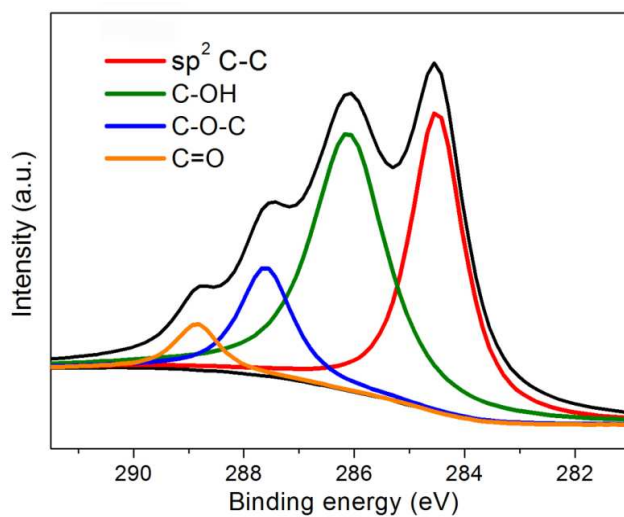

**Figure S5.** High-resolution C 1s XPS spectrum of GO, showing that the carbon sheets possess a large amount of oxygen functional groups.

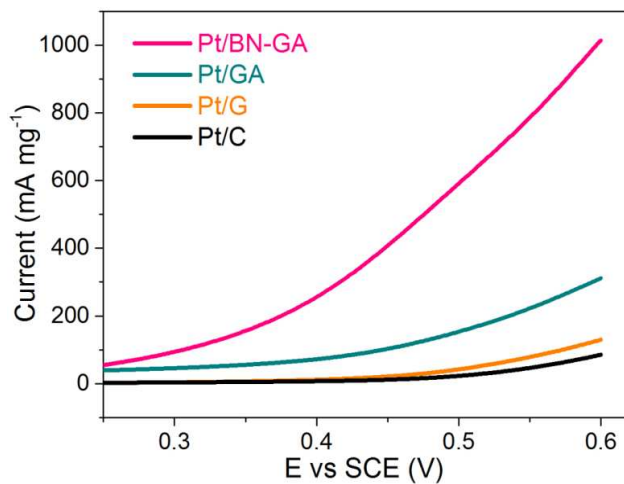

**Figure S6.** Linear sweep voltammetrys of Pt/BN-GA, Pt/GA, Pt/G, and Pt/C catalysts in 1 M  $\text{H}_2\text{SO}_4$  with 2 M methanol solution at  $20 \text{ mV s}^{-1}$ , implying that the catalytic reactions are easier to take place on the Pt/BN-GA electrode.

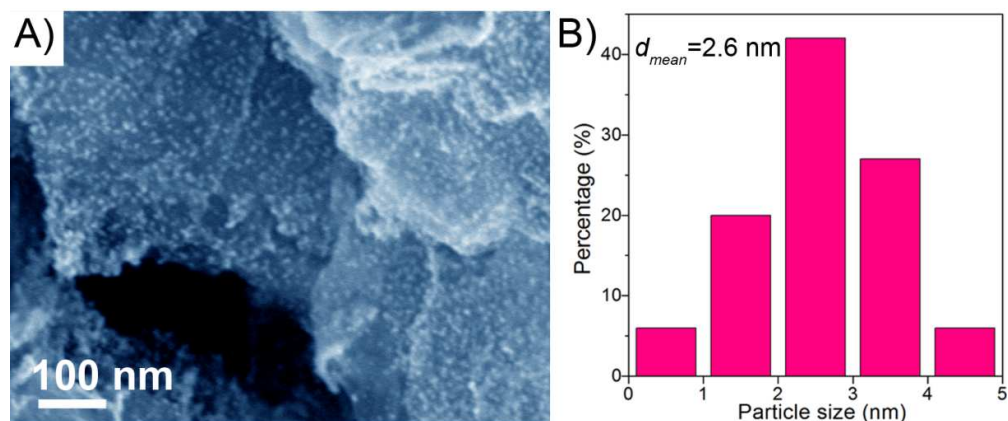

**Figure S7.** Representative (A) FE-SEM image and (B) Pt particle size distribution of the Pt/BN-GA catalyst after the chronoamperometric test, proving its good structural stability under the electrocatalytic conditions.

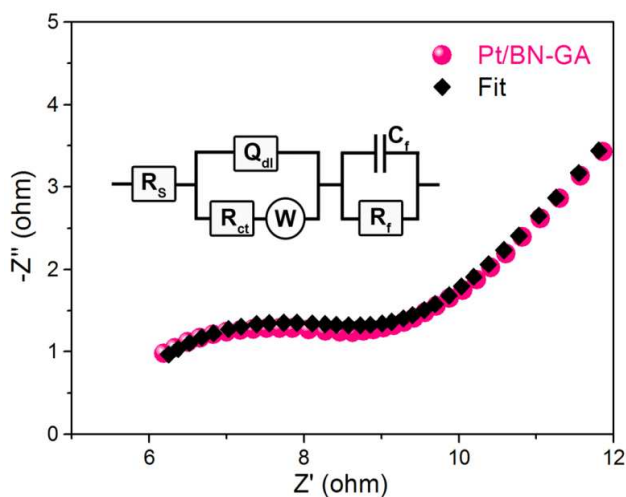

**Figure S8.** AC impedance spectrum of the Pt/BN-GA electrode and the corresponding fitting curve, proving a good match between the testing and fitting results. The inset is the equivalent circuit:  $R_s$  and  $R_{ct}$  represent the resistances for electrolyte and catalyst, respectively,  $Q_{dl}$  is a constant phase element,  $W$  represents semiinfinite diffusion at the interface between electrolyte and electrode,  $R_f$  and  $C_f$  are the resistance and capacitance for the Nafion-carbon film, respectively.

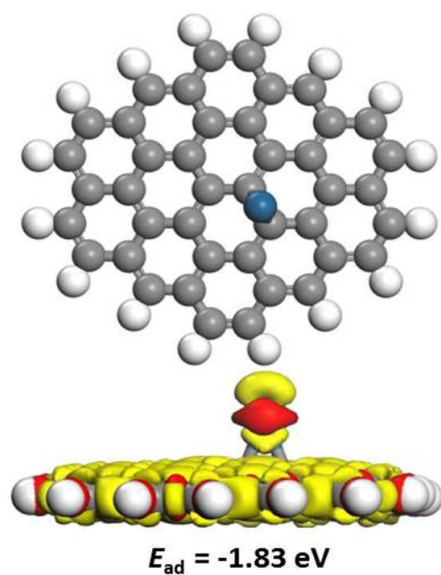

**Figure S9.** The relaxed atomic structures of a Pt atom adsorbed on an intrinsic graphene.
